# Supplementary material
Source: Springer Nature journal article supplement (https://www.springermedizin.de/resource/supplementary/13058_2010_2756_MOESM7_ESM.pdf/9702090)

Control

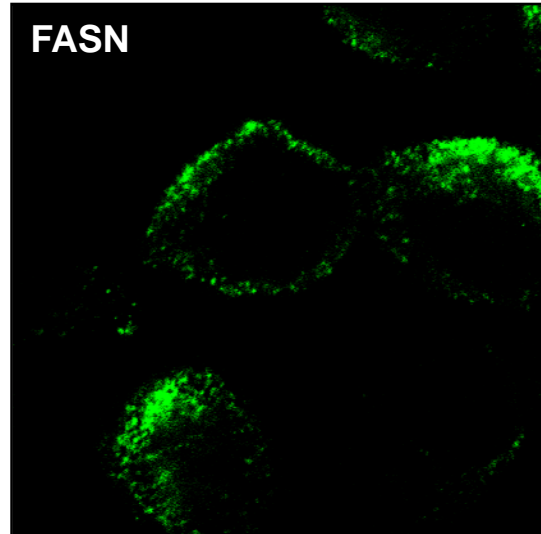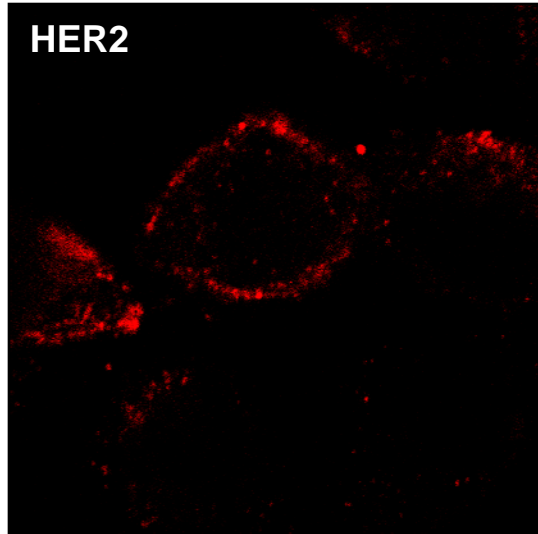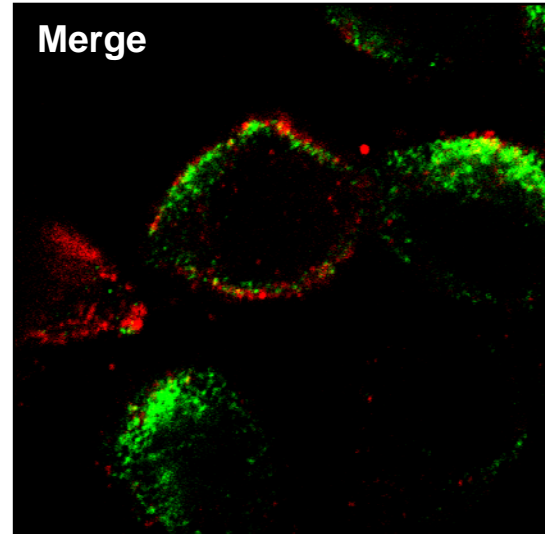

HRG 3h

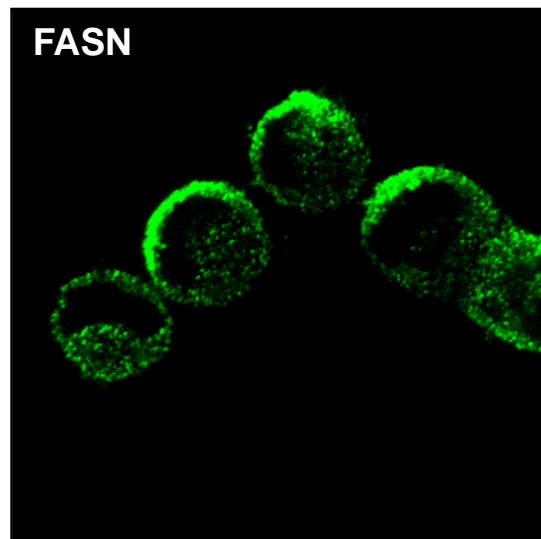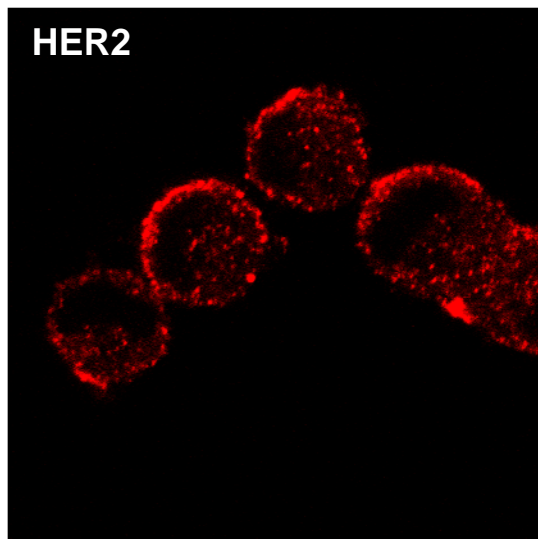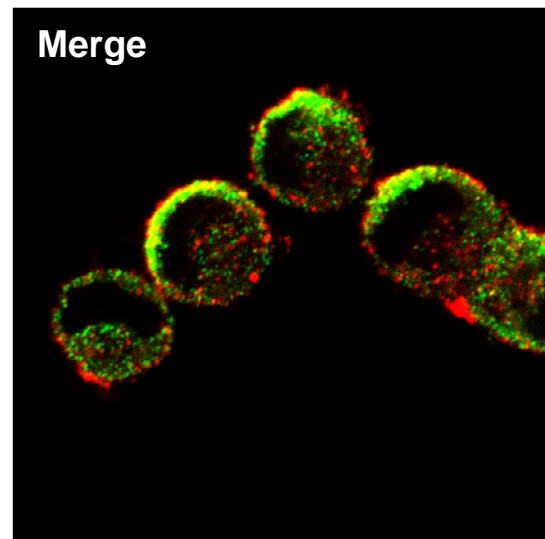

Supplement: MOESM7 [file 9702090]
